# Supplementary material
Source: PubMed Central journal article supplement (PMC9305088)

Supplemental Figure 1

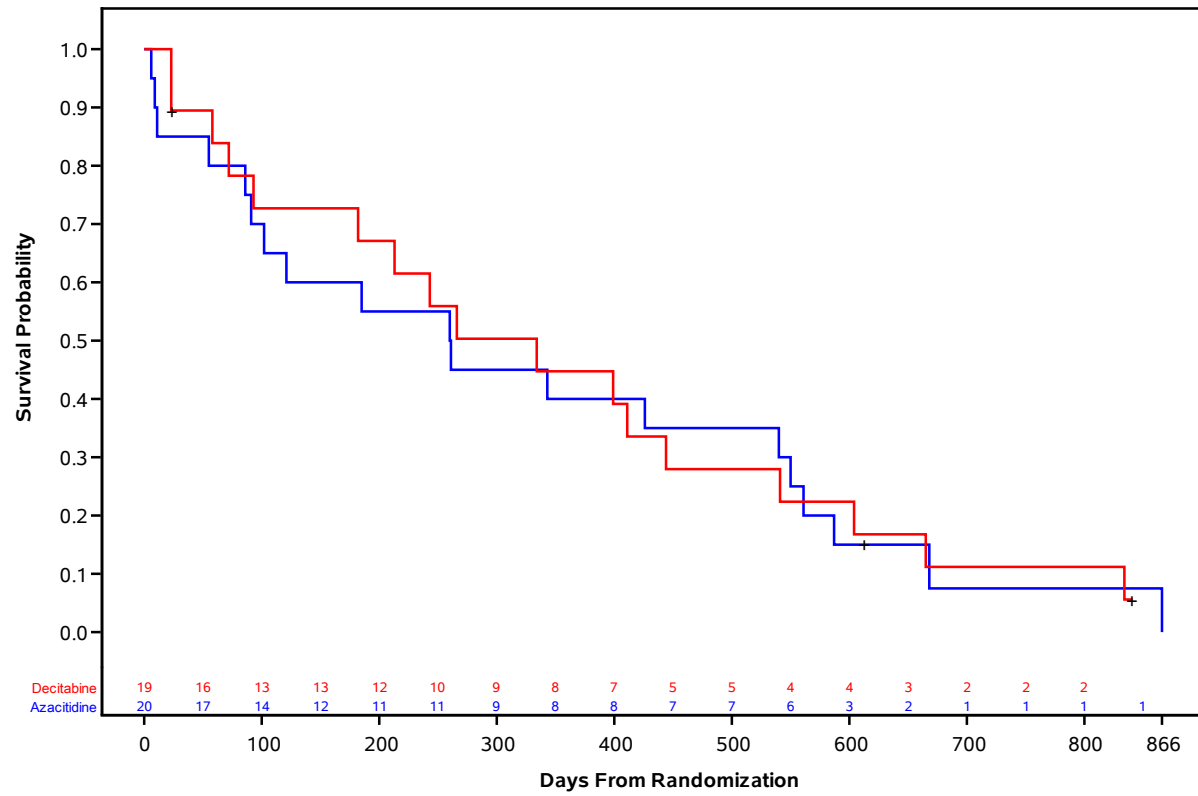

Supplement: bloodBLD2022015832-suppl1.pdf [file bloodBLD2022015832-suppl1.pdf]
